# Supplementary material
Source: PubMed Central journal article supplement (PMC1557602)

**Supplemental Figure 1.** Variation in microarray results across technical and biological replicates for expression of Gm-r1070-9002, which showed a significant developmental response ( $F=27.29$ ;  $p<0.01$ ). RNA from growing (T6) and fully expanded (T4) leaves were hybridized on each slide. Leaves were collected from both ambient  $[CO_2]$  (a) and elevated  $[CO_2]$  (b). RNA from 6 leaves per field plot of the experiment formed a biological replicate (Rep) and 2 replicates per field plot were sampled. Missing data indicate spots that were flagged by the Imagene software and therefore were not included in the analysis.

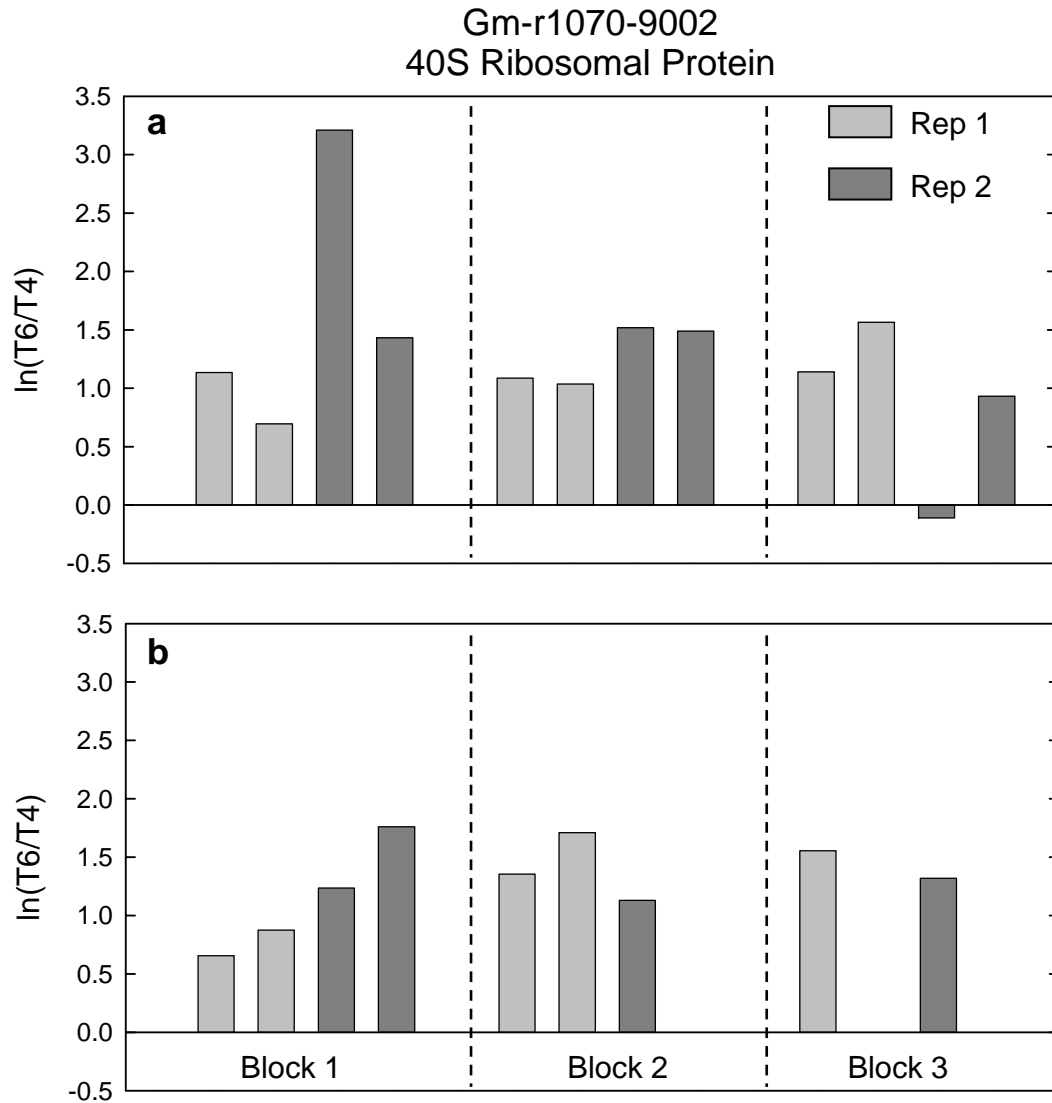

Supplement: plntphys_pp.106.086256_1.pdf [file plntphys_pp.106.086256_1.pdf]
