# Supplementary material
Source: PubMed Central journal article supplement (PMC1557602)
Supplement: plntphys_pp.106.086256_3.pdf [file plntphys_pp.106.086256_3.pdf]

**Supplemental Table 2.** Description of transcripts with a significant [CO<sub>2</sub>] x developmental stage interaction. Genes were clustered into four groups using k-means clustering (see Figure 3). Annotations are based first on the BLASTX hit of the 3' end EST if sequence information was available, and second on the 5' end EST.

|                  | <b>Clone ID</b>  | <b>Annotation</b>                                                   | <b>E</b>                                               |         |
|------------------|------------------|---------------------------------------------------------------------|--------------------------------------------------------|---------|
| <b>Cluster 1</b> | Gm-r1070-6478    | DAG [Antirrhinum majus]                                             | 6.6E-71                                                |         |
|                  | Gm-r1088-5307    | putative growth-on protein GRO10 [Oryza sativa]                     | 2.0E-18                                                |         |
|                  | Gm-r1088-8361    | DNA-binding protein PD1 [Pisum sativum]                             | 2.7E-34                                                |         |
|                  | Gm-r1070-8398    | chloroplast RNA binding protein [Phaseolus vulgaris]                | 5.8E-48                                                |         |
|                  | Gm-r1088-7127    | No Hits                                                             |                                                        |         |
|                  | Gm-r1070-1656    | At5g39570/MIJ24_40 [Arabidopsis thaliana]                           | 8.0E-21                                                |         |
|                  | Gm-r1070-3608    | unknown [Arabidopsis thaliana]                                      | 6.6E-17                                                |         |
|                  | Gm-r1070-7604    | At1g36050 [Arabidopsis thaliana]                                    | 2.9E-32                                                |         |
|                  | Gm-r1088-7685    | T6D22.8 [Arabidopsis thaliana]                                      | 1.5E-15                                                |         |
|                  | Gm-r1070-4312    | putative Mob1-like protein [Oryza sativa]                           | 6.6E-103                                               |         |
|                  | Gm-r1070-874     | triosephosphate isomerase [Glycine max]                             | 2.1E-25                                                |         |
|                  | Gm-r1088-8178    | lipxygenase [Citrus jambhiri]                                       | 1.9E-63                                                |         |
|                  | Gm-r1070-7482    | phosphatidylserine decarboxylase-like [Oryza sativa]                | 3.7E-38                                                |         |
|                  | Gm-r1070-8754    | acetyl-CoA carboxylase [Glycine max]                                | 1.4E-90                                                |         |
|                  | Gm-r1070-6484    | ATP synthase (gamma subunit, chloroplast precursor) [Pisum sativum] | 1.5E-79                                                |         |
|                  | Gm-r1070-8315    | photosystem I reaction center subunit III [Vigna radiata]           | 1.5E-81                                                |         |
|                  | Gm-r1070-4121    | casein kinase II alpha subunit [Sinapis alba]                       | 1.2E-30                                                |         |
|                  | Gm-r1070-4296    | putative CBL-interacting protein kinase 23 [Oryza sativa]           | 5.5E-34                                                |         |
|                  | Gm-r1070-7416    | LEC1-like protein [Phaseolus coccineus]                             | 9.9E-76                                                |         |
|                  | Gm-r1070-8950    | Helicase, C-terminal; Zinc finger, CCHC-type [Medicago truncatula]  | 8.0E-70                                                |         |
|                  | Gm-r1070-7242    | rpoC2 [Glycine max]                                                 | 9.8E-50                                                |         |
|                  | Gm-r1070-8885    | aspartyl protease family protein [Arabidopsis thaliana]             | 1.2E-08                                                |         |
|                  | Gm-r1070-5304    | calcium dependent protein kinase                                    | 3.9E-07                                                |         |
|                  | Gm-r1088-7022    | MDR-like p-glycoprotein [Arabidopsis thaliana]                      | 3.4E-58                                                |         |
|                  | Gm-r1070-8550    | plasma membrane H <sup>+</sup> ATPase [Prunus persica]              | 4.0E-15                                                |         |
|                  | Gm-r1070-7680    | putative plastid triose phosphate translocator [Glycine max]        | 1.9E-41                                                |         |
|                  | Gm-r1070-5372    | No Hits                                                             |                                                        |         |
|                  | Gm-r1070-3541    | No Hits                                                             |                                                        |         |
|                  | Gm-r1070-5874    | unknown protein [Arabidopsis thaliana]                              | 8.2E-21                                                |         |
|                  | Gm-r1070-7217    | No Hits                                                             |                                                        |         |
|                  | Gm-r1070-8604    | KH domain-containing protein [Betula platyphylla]                   | 1.6E-52                                                |         |
|                  | Gm-r1088-6856    | At3g09980 [Arabidopsis thaliana]                                    | 1.7E-43                                                |         |
|                  | <b>Cluster 2</b> | Gm-r1070-3758                                                       | ribosomal protein small subunit 28 [Helianthus annuus] | 4.9E-20 |
|                  |                  | Gm-r1070-6640                                                       | ribosomal protein L38-like [Solanum tuberosum]         | 2.0E-28 |
|                  |                  | Gm-r1070-8751                                                       | ribosomal protein L29 [Panax ginseng]                  | 1.1E-21 |
|                  |                  | Gm-r1070-5946                                                       | No Hits                                                |         |

|                  |                                                                                                 |         |
|------------------|-------------------------------------------------------------------------------------------------|---------|
| Gm-r1070-4689    | No Hits                                                                                         |         |
| Gm-r1070-5287    | No Hits                                                                                         |         |
| Gm-r1070-5896    | No Hits                                                                                         |         |
| Gm-r1070-6662    | unknown [Arabidopsis thaliana]                                                                  | 2.2E-22 |
| Gm-r1070-8744    | allantoinase [Robinia pseudoacacia]                                                             | 2.0E-55 |
| Gm-r1070-7989    | BiP [Glycine max]                                                                               | 4.7E-60 |
| Gm-r1070-9103    | protein phosphatase 2C [Medicago sativa]                                                        | 1.6E-27 |
| Gm-r1070-8375    | DNAJ protein-like [Arabidopsis thaliana]                                                        | 1.2E-32 |
| Gm-r1070-4491    | No Hits                                                                                         |         |
| Gm-r1070-9110    | AT5g55220/MCO15_17 [Arabidopsis thaliana]                                                       | 6.3E-31 |
| Gm-r1070-2402    | No Hits                                                                                         |         |
| Gm-r1070-1266    | No Hits                                                                                         |         |
| Gm-r1070-4147    | AT5g55940/MYN21_5 [Arabidopsis thaliana]                                                        | 9.0E-61 |
| Gm-r1070-5320    | expressed protein [Arabidopsis thaliana]                                                        | 2.5E-23 |
| Gm-r1070-8574    | expressed protein [Arabidopsis thaliana]                                                        | 5.3E-18 |
| Gm-r1070-9170    | 3-oxoacyl-[acyl-carrier protein] reductase; beta-ketoacyl-ACP reductase [Cuphea lanceolata]     | 2.9E-30 |
| Gm-r1070-6846    | NADPH-protochlorophyllide oxidoreductase [Cucumis sativus]                                      | 1.7E-77 |
| Gm-r1070-8056    | putative TIP120 protein [Oryza sativa (japonica cultivar-group)]                                | 3.7E-45 |
| Gm-r1070-5692    | 26S proteasome regulatory subunit, putative (RPN5) [Arabidopsis thaliana]                       | 9.1E-35 |
| Gm-r1070-8184    | 20S proteasome beta subunit PBB2 [Arabidopsis thaliana]                                         | 2.1E-72 |
| Gm-r1070-3694    | 40S ribosomal protein S19-like [Arabidopsis thaliana]                                           | 5.1E-22 |
| Gm-r1070-6638    | eIF3e [Arabidopsis thaliana]                                                                    | 2.5E-89 |
| Gm-r1070-6140    | putative RING3 protein [Oryza sativa]                                                           | 1.1E-08 |
| Gm-r1070-7982    | putative small nuclear ribonucleoprotein polypeptide E [Oryza sativa (japonica cultivar-group)] | 2.4E-36 |
| Gm-r1070-8620    | MAP kinase PsMAPK2 [Pisum sativum]                                                              | 5.3E-49 |
| Gm-r1070-9097    | calnexin [Glycine max]                                                                          | 4.2E-77 |
| Gm-r1070-7474    | stress related protein, putative [Arabidopsis thaliana]                                         | 4.7E-32 |
| Gm-r1070-7772    | putative protein [Arabidopsis thaliana]                                                         | 7.6E-81 |
| Gm-r1070-8984    | No Hits                                                                                         |         |
| Gm-r1070-3130    | chaperonin precursor [Pisum sativum]                                                            | 9.0E-32 |
| Gm-r1070-3018    | putative Lysyl-tRNA synthetase [Oryza sativa]                                                   | 3.9E-25 |
| Gm-r1070-7104    | At1g31850/68069_m00154 [Arabidopsis thaliana]                                                   | 1.7E-43 |
| Gm-r1070-8602    | putative triosephosphate isomerase [Arabidopsis thaliana]                                       | 1.7E-76 |
| Gm-r1070-5700    | putative acetyltransferase [Arabidopsis thaliana]                                               | 5.5E-44 |
| Gm-r1070-5948    | No Hits                                                                                         |         |
| Gm-r1070-6086    | unknown protein [Oryza sativa]                                                                  | 2.9E-23 |
| Gm-r1070-8994    | transcription factor lim1 [Eucalyptus camaldulensis]                                            | 2.7E-76 |
| <b>Cluster 3</b> |                                                                                                 |         |
| Gm-r1070-2069    | cullin [Arabidopsis thaliana]                                                                   | 3.2E-29 |
| Gm-r1070-1591    | probable ubiquitin-like protein [imported] - Arabidopsis thaliana                               | 6.8E-26 |

|               |                                                                         |          |
|---------------|-------------------------------------------------------------------------|----------|
| Gm-r1070-257  | ubiquitin fusion protein [Arachis hypogaea]                             | 1.1E-39  |
| Gm-r1070-3911 | ribosomal protein S5 [Spinacia oleracea]                                | 2.9E-10  |
| Gm-r1070-4267 | carbonic anhydrase 2 [Flaveria bidentis]                                | 4.2E-42  |
| Gm-r1070-921  | No Hits                                                                 |          |
| Gm-r1070-6562 | No Hits                                                                 |          |
| Gm-r1070-795  | No Hits                                                                 |          |
| Gm-r1070-829  | No Hits                                                                 |          |
| Gm-r1088-8096 | No Hits                                                                 |          |
| Gm-r1070-4803 | fiber protein Fb12 [Gossypium barbadense]                               | 6.1E-37  |
| Gm-r1070-3835 | putative beta-phosphoglucosyltransferase [Arabidopsis thaliana]         | 9.8E-49  |
| Gm-r1070-1020 | Similar to dTDP-D-glucose 4,6-dehydratase [Arabidopsis thaliana]        | 1.3E-18  |
| Gm-r1070-1390 | glycinin [Glycine max]                                                  | 6.0E-26  |
| Gm-r1070-2259 | putative ethanolamine kinase 1 [Oryza sativa]                           | 8.2E-16  |
| Gm-r1070-1399 | annexin [Cicer arietinum]                                               | 4.7E-14  |
| Gm-r1070-801  | asparaginyl endopeptidase (VmPE-1) [Vigna mungo]                        | 0        |
| Gm-r1088-3109 | putative CAAX amino terminal protease family protein [Solanum demissum] | 1.9E-62  |
| Gm-r1070-261  | protein phosphatase type 2C [Lotus japonicus]                           | 2.9E-23  |
| Gm-r1070-395  | putative integral membrane protein [Phaseolus vulgaris]                 | 9.8E-90  |
| Gm-r1070-4675 | 60S ribosomal protein L21 [Oryza sativa (japonica cultivar-group)]      | 4.2E-84  |
| Gm-r1088-7328 | ascorbate oxidase precursor [Glycine max]                               | 6.2E-47  |
| Gm-r1088-2433 | helicase-like protein [Arabidopsis thaliana]                            | 1.1E-20  |
| Gm-r1070-4035 | Sali3-2 [Glycine max]                                                   | 3.6E-95  |
| Gm-r1070-4157 | Chain 1, Bean Pod Mottle Virus (Bpmv), Top Component                    | 3.0E-6   |
| Gm-r1070-1765 | adenosine 5'-phosphosulfate reductase [Glycine max]                     | 2.1E-74  |
| Gm-r1070-909  | oligouridylylate binding protein [Nicotiana plumbaginifolia]            | 2.1E-29  |
| Gm-r1070-3845 | No Hits                                                                 |          |
| Gm-r1070-473  | SAM (and some other nucleotide) binding motif [Medicago truncatula]     | 3.0 E-17 |
| Gm-r1070-1935 | At1g75460/F1B16_22 [Arabidopsis thaliana]                               | 1.7E-28  |
| Gm-r1070-917  | No Hits                                                                 |          |
| Gm-r1070-919  | No Hits                                                                 |          |
| Gm-r1070-823  | No Hits                                                                 |          |
| Gm-r1070-1013 | No Hits                                                                 |          |
| Gm-r1070-1019 | No Hits                                                                 |          |
| Gm-r1070-1395 | No Hits                                                                 |          |
| Gm-r1070-1793 | expressed protein [Arabidopsis thaliana]                                | 3.3E-17  |
| Gm-r1070-2327 | No Hits                                                                 |          |
| Gm-r1070-241  | putative protein [Arabidopsis thaliana]                                 | 2.5E-55  |
| Gm-r1070-3851 | No Hits                                                                 |          |
| Gm-r1070-6401 | unknown [Arabidopsis thaliana]                                          | 3.2E-19  |
| Gm-r1070-997  | No Hits                                                                 |          |
| Gm-r1070-39   | Similar to phosphoribosylanthranilate transferase from                  | 6.1E-26  |

Pisum sativum [Arabidopsis thaliana]

|                  |               |                                                                                                |         |
|------------------|---------------|------------------------------------------------------------------------------------------------|---------|
| <b>Cluster 4</b> | Gm-r1070-6804 | No Hits                                                                                        |         |
|                  | Gm-r1088-751  | At1g51580 [Arabidopsis thaliana]                                                               | 8.8E-27 |
|                  | Gm-r1088-839  | unnamed protein product [Arabidopsis thaliana]                                                 | 9.1E-35 |
|                  | Gm-r1070-2173 | No Hits                                                                                        |         |
|                  | Gm-r1070-6303 | unnamed protein product [Arabidopsis thaliana]                                                 | 1.9E-17 |
|                  | Gm-r1070-9038 | Ni-binding urease accessory protein UreG [Glycine max]                                         | 4.7E-68 |
|                  | Gm-r1088-3825 | kinesin heavy chain, putative [Arabidopsis thaliana]                                           | 6.9E-46 |
|                  | Gm-r1070-5796 | putative NAD dependent epimerase [Arabidopsis thaliana]                                        | 2.2E-90 |
|                  | Gm-r1088-767  | glycosyl hydrolase family 17 protein [Arabidopsis thaliana]                                    | 4.0E-62 |
|                  | Gm-r1070-5263 | putative protein phosphatase [Oryza sativa (japonica cultivar-group)]                          | 2.5E-20 |
|                  | Gm-r1070-2913 | putative ribophorin I [Arabidopsis thaliana]                                                   | 5.0E-82 |
|                  | Gm-r1070-6083 | cysteine protease [Ipomoea batatas]                                                            | 1.1E-49 |
|                  | Gm-r1070-2921 | putative ribosomal protein L7 [Arabidopsis thaliana]                                           | 1.3E-33 |
|                  | Gm-r1088-4199 | plastid-specific ribosomal protein 2 precursor [Spinacia oleracea]                             | 1.3E-52 |
|                  | Gm-r1088-2243 | putative cyclic nucleotide and calmodulin-regulated ion channel protein [Arabidopsis thaliana] | 1.7E-32 |
|                  | Gm-r1088-1027 | No Hits                                                                                        |         |
|                  | Gm-r1088-953  | No Hits                                                                                        |         |
|                  | Gm-r1070-5026 | No Hits                                                                                        |         |
|                  | Gm-r1070-2665 | No Hits                                                                                        |         |
|                  | Gm-r1088-941  | No Hits                                                                                        |         |
|                  | Gm-r1070-4051 | fiber protein Fb33 [Gossypium barbadense]                                                      | 9.7E-56 |
|                  | Gm-r1070-6383 | No Hits                                                                                        |         |
|                  | Gm-r1070-2555 | apyrase GS52 [Glycine soja]                                                                    | 8.9E-26 |

---
