# Supplementary material
Source: PubMed Central journal article supplement (PMC1557602)
Supplement: plntphys_pp.106.086256_4.pdf [file plntphys_pp.106.086256_4.pdf]

**Supplemental Table 3.** Transcripts with differential expression patterns in elevated (E) and ambient (A) carbon dioxide concentration ([CO<sub>2</sub>]). Annotations are based first on the BLASTX hit of the 3' end EST if sequence information was available, and second on the 5' end EST.

| Clone ID      | Annotation                                                   | F     | p      | E/A   |
|---------------|--------------------------------------------------------------|-------|--------|-------|
| Gm-r1070-4675 | 60S ribosomal protein L21 [ <i>Oryza sativa</i> ]            | 56.63 | 0.0003 | 0.673 |
| Gm-r1070-1059 | No hits                                                      | 11.74 | 0.0140 | 0.678 |
| Gm-r1070-1071 | No hits                                                      | 17.40 | 0.0059 | 0.682 |
| Gm-r1070-481  | No hits                                                      | 13.12 | 0.0111 | 0.698 |
| Gm-r1070-1301 | No hits                                                      | 16.04 | 0.0071 | 0.700 |
| Gm-r1070-588  | No hits                                                      | 6.16  | 0.0477 | 0.700 |
| Gm-r1070-883  | No hits                                                      | 13.61 | 0.0102 | 0.704 |
| Gm-r1070-1505 | pectin methylesterase isoform alpha [ <i>Vigna radiata</i> ] | 11.48 | 0.0147 | 0.709 |
| Gm-r1070-4055 | PAC motif-containing protein [ <i>Arabidopsis thaliana</i> ] | 7.48  | 0.0340 | 0.710 |
| Gm-r1070-107  | ribosomal protein L31                                        | 7.18  | 0.0366 | 0.711 |
| Gm-r1070-2402 | No hits                                                      | 29.36 | 0.0016 | 0.711 |
| Gm-r1070-825  | No hits                                                      | 8.69  | 0.0257 | 0.718 |
| Gm-r1070-1257 | 60S ribosomal protein L7A [ <i>Arabidopsis thaliana</i> ]    | 11.60 | 0.0144 | 0.719 |
| Gm-r1070-509  | unknown protein [ <i>Oryza sativa</i> ]                      | 8.01  | 0.0299 | 0.725 |
| Gm-r1070-1299 | No hits                                                      | 6.05  | 0.0491 | 0.726 |
| Gm-r1070-1061 | No hits                                                      | 26.92 | 0.0020 | 0.728 |
| Gm-r1070-868  | No hits                                                      | 11.16 | 0.0156 | 0.731 |
| Gm-r1070-1217 | No hits                                                      | 8.67  | 0.0258 | 0.732 |
| Gm-r1070-1249 | No hits                                                      | 11.16 | 0.0156 | 0.733 |
| Gm-r1070-701  | No hits                                                      | 10.27 | 0.0185 | 0.741 |
| Gm-r1070-881  | No hits                                                      | 13.30 | 0.0108 | 0.746 |
| Gm-r1070-1269 | No hits                                                      | 9.33  | 0.0224 | 0.751 |
| Gm-r1070-2597 | No hits                                                      | 9.28  | 0.0226 | 0.753 |
| Gm-r1070-4491 | No hits                                                      | 12.35 | 0.0126 | 0.753 |
| Gm-r1070-1070 | No hits                                                      | 23.55 | 0.0028 | 0.753 |
| Gm-r1070-871  | No hits                                                      | 14.55 | 0.0088 | 0.755 |
| Gm-r1070-1455 | unknown protein [ <i>Arabidopsis thaliana</i> ]              | 7.47  | 0.0340 | 0.755 |
| Gm-r1070-608  | No hits                                                      | 6.38  | 0.0449 | 0.757 |
| Gm-r1088-8100 | unknown [ <i>Zea mays</i> ]                                  | 6.23  | 0.0372 | 0.757 |
| Gm-r1070-101  | trypsin inhibitor subtype A [ <i>Glycine max</i> ]           | 8.67  | 0.0258 | 0.760 |
| Gm-r1070-907  | No hits                                                      | 11.72 | 0.0141 | 0.760 |
| Gm-r1070-1459 | No hits                                                      | 7.30  | 0.0355 | 0.771 |

|               |                                                                       |       |        |       |
|---------------|-----------------------------------------------------------------------|-------|--------|-------|
| Gm-r1070-1375 | No hits                                                               | 7.85  | 0.0311 | 0.771 |
| Gm-r1070-1687 | glycinin A5A4B3 precursor - soybean (fragment)                        | 8.18  | 0.0288 | 0.771 |
| Gm-r1070-2928 | No hits                                                               | 10.66 | 0.0172 | 0.772 |
| Gm-r1070-1137 | unknown protein [Arabidopsis thaliana]                                | 16.17 | 0.0069 | 0.779 |
| Gm-r1088-2139 | putative nitrate transporter [Arabidopsis thaliana]                   | 9.43  | 0.0153 | 0.780 |
| Gm-r1070-4052 | No hits                                                               | 6.51  | 0.0435 | 0.780 |
| Gm-r1070-3033 | putative acyl-CoA synthetase [Capsicum annuum]                        | 6.91  | 0.0392 | 0.782 |
| Gm-r1070-1503 | hypothetical protein [Capsicum chinense]                              | 8.16  | 0.0289 | 0.783 |
| Gm-r1070-1267 | No hits                                                               | 11.82 | 0.0138 | 0.786 |
| Gm-r1070-1270 | No hits                                                               | 14.42 | 0.0090 | 0.791 |
| Gm-r1070-3931 | No hits                                                               | 7.93  | 0.0305 | 0.793 |
| Gm-r1070-309  | alpha' subunit of beta-conglycinin [Glycine max]                      | 6.74  | 0.0409 | 0.794 |
| Gm-r1070-4163 | No hits                                                               | 6.62  | 0.0422 | 0.796 |
| Gm-r1070-4875 | No hits                                                               | 11.24 | 0.0154 | 0.797 |
| Gm-r1070-1083 | No hits                                                               | 9.11  | 0.0235 | 0.797 |
| Gm-r1070-1268 | AKIN beta3 [Medicago truncatula] (5')                                 | 14.07 | 0.0095 | 0.797 |
| Gm-r1070-703  | putative protein kinase C inhibitor [Arabidopsis thaliana]            | 8.85  | 0.0248 | 0.797 |
| Gm-r1070-2922 | No hits                                                               | 17.18 | 0.0060 | 0.800 |
| Gm-r1070-905  | No hits                                                               | 10.54 | 0.0175 | 0.800 |
| Gm-r1070-933  | unknown protein [Arabidopsis thaliana]                                | 6.26  | 0.0463 | 0.804 |
| Gm-r1070-3112 | No hits                                                               | 7.68  | 0.0324 | 0.805 |
| Gm-r1070-2806 | No hits                                                               | 17.61 | 0.0057 | 0.805 |
| Gm-r1070-1507 | U3-55K-like protein 2 [Arabidopsis thaliana]                          | 6.70  | 0.0413 | 0.806 |
| Gm-r1070-927  | expressed protein [Arabidopsis thaliana]                              | 6.68  | 0.0416 | 0.806 |
| Gm-r1070-5180 | No hits                                                               | 11.16 | 0.0156 | 0.806 |
| Gm-r1070-1068 | putative endosomal protein [Arabidopsis thaliana]                     | 14.46 | 0.0089 | 0.809 |
| Gm-r1070-1395 | No hits                                                               | 10.09 | 0.0192 | 0.809 |
| Gm-r1070-1101 | allene-oxide cyclase [Medicago truncatula]                            | 8.65  | 0.0259 | 0.811 |
| Gm-r1070-1021 | putative small nuclear ribonucleoprotein polypeptide F [Oryza sativa] | 10.41 | 0.0180 | 0.811 |
| Gm-r1070-1399 | annexin [Cicer arietinum]                                             | 8.81  | 0.0250 | 0.814 |
| Gm-r1070-2191 | B-gal alpha peptide [Shuttle vector pMQ61]                            | 6.86  | 0.0397 | 0.814 |
| Gm-r1070-1373 | No hits                                                               | 6.43  | 0.0443 | 0.814 |
| Gm-r1070-2555 | apyrase GS52 [Glycine soja]                                           | 20.92 | 0.0038 | 0.818 |
| Gm-r1070-1281 | ribosomal protein S19                                                 | 31.70 | 0.0013 | 0.822 |
| Gm-r1070-1139 | No hits                                                               | 8.59  | 0.0262 | 0.822 |
| Gm-r1070-3423 | acid phosphatase [Glycine max]                                        | 8.21  | 0.0286 | 0.824 |
| Gm-r1070-1073 | No hits                                                               | 6.12  | 0.0482 | 0.827 |
| Gm-r1070-1710 | Adenylate kinase B (ATP-AMP transphosphorylase)                       | 12.21 | 0.0129 | 0.832 |

|               |                                                                                      |       |        |       |
|---------------|--------------------------------------------------------------------------------------|-------|--------|-------|
| Gm-r1088-4235 | glycosyl hydrolase family 17 protein [Arabidopsis thaliana]                          | 7.03  | 0.0292 | 0.838 |
| Gm-r1070-4149 | thylakoid lumen protein, chloroplast precursor [Arabidopsis thaliana]                | 8.53  | 0.0266 | 0.839 |
| Gm-r1070-511  | No hits                                                                              | 8.12  | 0.0292 | 0.841 |
| Gm-r1070-1074 | No hits                                                                              | 9.23  | 0.0228 | 0.842 |
| Gm-r1070-1481 | truncated copper-binding protein CUTA (CUTA) [Arabidopsis thaliana]                  | 7.88  | 0.0308 | 0.846 |
| Gm-r1088-1813 | N-acetylglucosamine-phosphate mutase [Arabidopsis thaliana]                          | 7.62  | 0.0247 | 0.849 |
| Gm-r1088-4493 | non-repetitive/WGA-negative nucleoporin family protein [Arabidopsis thaliana]        | 8.30  | 0.0205 | 0.851 |
| Gm-r1070-4147 | AT5g55940/MYN21_5 [Arabidopsis thaliana]                                             | 7.22  | 0.0362 | 0.852 |
| Gm-r1070-1473 | C2 domain-containing protein [Cicer arietinum]                                       | 26.28 | 0.0022 | 0.856 |
| Gm-r1088-2433 | helicase-like protein [Arabidopsis thaliana]                                         | 5.97  | 0.0403 | 0.857 |
| Gm-r1088-5814 | ATP binding / ATP-dependent helicase/ RNA helicase/ helicase/ [Arabidopsis thaliana] | 8.74  | 0.0182 | 0.859 |
| Gm-r1070-6272 | No hits                                                                              | 7.62  | 0.0329 | 0.861 |
| Gm-r1070-2668 | No hits                                                                              | 6.42  | 0.0444 | 0.861 |
| Gm-r1070-3036 | No hits                                                                              | 8.19  | 0.0288 | 0.865 |
| Gm-r1070-4157 | Chain 1, Bean Pod Mottle Virus (Bpmv), Top Component                                 | 6.92  | 0.0390 | 0.867 |
| Gm-r1070-874  | triosephosphate isomerase [Glycine max]                                              | 8.43  | 0.0272 | 0.902 |
| Gm-r1088-5244 | unnamed protein product [Arabidopsis thaliana]                                       | 8.57  | 0.0191 | 0.904 |
| Gm-r1088-6769 | unnamed protein product [Arabidopsis thaliana]                                       | 5.37  | 0.0491 | 0.909 |
| Gm-r1088-2199 | Putative phosphatase 2A inhibitor [Arabidopsis thaliana]                             | 6.02  | 0.0398 | 0.921 |
| Gm-r1088-4763 | unknown protein [Arabidopsis thaliana]                                               | 5.88  | 0.0415 | 1.114 |
| Gm-r1088-4646 | ubiquitin-conjugating enzyme E2 [Gossypium raimondii]                                | 6.33  | 0.0360 | 1.116 |
| Gm-r1070-8546 | No hits                                                                              | 8.65  | 0.0259 | 1.120 |
| Gm-r1070-6993 | hypothetical protein Tfus02000823 [Thermobifida fusca]                               | 8.80  | 0.0250 | 1.129 |
| Gm-r1070-7416 | LEC1-like protein [Phaseolus coccineus]                                              | 6.36  | 0.0452 | 1.136 |
| Gm-r1070-5991 | F28K19.29 [Arabidopsis thaliana]                                                     | 6.74  | 0.0409 | 1.139 |
| Gm-r1070-5341 | unknown protein [Arabidopsis thaliana]                                               | 6.62  | 0.0422 | 1.140 |
| Gm-r1070-4232 | No hits                                                                              | 8.23  | 0.0285 | 1.141 |
| Gm-r1070-5429 | cytosolic phosphoglycerate kinase [Pisum sativum]                                    | 10.60 | 0.0173 | 1.142 |
| Gm-r1070-3469 | omega-3 fatty acid desaturase (EC 1.14.99.-) GMD [similarity] - soybean              | 7.02  | 0.0380 | 1.145 |
| Gm-r1070-8622 | hypothetical protein [Cicer arietinum]                                               | 6.22  | 0.0470 | 1.153 |
| Gm-r1070-7398 | putative RING zinc finger protein [Arabidopsis thaliana]                             | 7.60  | 0.0330 | 1.162 |
| Gm-r1070-5320 | expressed protein [Arabidopsis thaliana]                                             | 6.46  | 0.0439 | 1.165 |
| Gm-r1070-9038 | putative urease accessory protein G [Oryza sativa]                                   | 7.46  | 0.0342 | 1.167 |
| Gm-r1070-4318 | F1-ATP synthase delta subunit [Ipomoea batatas]                                      | 6.08  | 0.0488 | 1.168 |
| Gm-r1070-5274 | unnamed protein product [Arabidopsis thaliana]                                       | 12.29 | 0.0127 | 1.170 |
| Gm-r1070-7785 | cytosolic malate dehydrogenase [Glycine max]                                         | 9.77  | 0.0205 | 1.171 |

|               |                                                                                |       |        |       |
|---------------|--------------------------------------------------------------------------------|-------|--------|-------|
| Gm-r1070-8883 | nucleoid DNA-binding-like protein [Arabidopsis thaliana]                       | 8.30  | 0.0280 | 1.173 |
| Gm-r1088-839  | unnamed protein product [Arabidopsis thaliana]                                 | 7.38  | 0.0264 | 1.178 |
| Gm-r1070-7820 | Similar to SOUL Protein [Arabidopsis thaliana]                                 | 7.02  | 0.0380 | 1.181 |
| Gm-r1070-8504 | Proteasome subunit alpha type 3                                                | 6.39  | 0.0448 | 1.187 |
| Gm-r1070-5372 | No hits                                                                        | 15.10 | 0.0081 | 1.187 |
| Gm-r1070-8855 | putative splicing factor [Cicer arietinum]                                     | 17.41 | 0.0059 | 1.189 |
| Gm-r1070-8885 | aspartyl protease family protein [Arabidopsis thaliana]                        | 7.72  | 0.0321 | 1.192 |
| Gm-r1070-6484 | ATP synthase (gamma subunit) [Pisum sativum]                                   | 18.97 | 0.0048 | 1.193 |
| Gm-r1070-6964 | putative peroxisomal membrane protein PEX11-1 [Arabidopsis thaliana]           | 8.52  | 0.0267 | 1.194 |
| Gm-r1070-7855 | AT4g18710 [Arabidopsis thaliana], shaggy-like protein kinase etha (EC 2.7.1.-) | 6.60  | 0.0424 | 1.195 |
| Gm-r1070-6065 | hydrogen-transporting ATPase, rotational mechanism [Arabidopsis thaliana]      | 6.16  | 0.0476 | 1.198 |
| Gm-r1070-5853 | unknown protein [Arabidopsis thaliana]                                         | 6.21  | 0.0470 | 1.204 |
| Gm-r1070-5896 | No hits                                                                        | 7.20  | 0.0364 | 1.207 |
| Gm-r1070-8315 | photosystem I reaction center subunit III [Vigna radiata]                      | 7.50  | 0.0338 | 1.208 |
| Gm-r1070-6966 | transcription factor EIL1 [Vigna radiata]                                      | 22.66 | 0.0031 | 1.208 |
| Gm-r1070-3700 | cyclophilin [Cucumis sativus]                                                  | 6.49  | 0.0436 | 1.210 |
| Gm-r1070-6442 | enolase, isoform 2 [Hevea brasiliensis]                                        | 10.73 | 0.0169 | 1.214 |
| Gm-r1070-5659 | responce reactor 4 [Arabidopsis thaliana]                                      | 7.72  | 0.0321 | 1.215 |
| Gm-r1070-7015 | No hits                                                                        | 6.79  | 0.0403 | 1.216 |
| Gm-r1070-7800 | L-galactose-1-phosphate phosphatase [Actinidia deliciosa]                      | 8.82  | 0.0250 | 1.217 |
| Gm-r1070-5026 | No hits                                                                        | 25.17 | 0.0024 | 1.217 |
| Gm-r1070-7770 | hypothetical protein [Nicotiana tabacum]; DNA binding [Arabidopsis thaliana]   | 17.97 | 0.0054 | 1.218 |
| Gm-r1070-7399 | unknown protein [Arabidopsis thaliana]; GO: response to stress                 | 7.48  | 0.0340 | 1.219 |
| Gm-r1070-8647 | core protein [Pisum sativum]                                                   | 6.71  | 0.0412 | 1.222 |
| Gm-r1070-4830 | Peptidase C1A, papain; Somatotropin hormone [Medicago truncatula]              | 7.61  | 0.0329 | 1.223 |
| Gm-r1070-1714 | homogentisate phytylprenyltransferase [Glycine max]                            | 14.87 | 0.0084 | 1.224 |
| Gm-r1070-6056 | BEL1-related homeotic protein 29 [Solanum tuberosum]                           | 6.25  | 0.0465 | 1.225 |
| Gm-r1070-7337 | unknown protein [Arabidopsis thaliana]                                         | 11.13 | 0.0157 | 1.227 |
| Gm-r1070-5742 | putative PRT1 protein [Arabidopsis thaliana]                                   | 7.01  | 0.0381 | 1.227 |
| Gm-r1070-7935 | Dc3 promoter-binding factor-3 [Helianthus annuus]                              | 7.38  | 0.0348 | 1.228 |
| Gm-r1070-6613 | eukaryotic initiation factor 4, eIF4-like protein [Arabidopsis thaliana]       | 7.89  | 0.0308 | 1.228 |
| Gm-r1070-6635 | unknown protein [Arabidopsis thaliana]                                         | 10.53 | 0.0176 | 1.230 |
| Gm-r1070-6474 | structural molecule [Arabidopsis thaliana] chloroplast                         | 6.68  | 0.0416 | 1.230 |
| Gm-r1070-3096 | transcription factor EIL2 [Vigna radiata]                                      | 7.90  | 0.0307 | 1.231 |
| Gm-r1070-6672 | hyuC-like protein [Arabidopsis thaliana]                                       | 7.29  | 0.0356 | 1.235 |

|               |                                                                                     |       |        |       |
|---------------|-------------------------------------------------------------------------------------|-------|--------|-------|
| Gm-r1088-8748 | amidohydrolase family [Arabidopsis thaliana]                                        | 5.48  | 0.0473 | 1.236 |
| Gm-r1070-3954 | myb family transcription factor [Arabidopsis thaliana]                              | 6.41  | 0.0446 | 1.237 |
| Gm-r1070-6086 | unknown protein [Oryza sativa]                                                      | 26.71 | 0.0021 | 1.238 |
| Gm-r1070-7963 | Tubulin beta-3 chain (Beta-3 tubulin)                                               | 9.87  | 0.0200 | 1.239 |
| Gm-r1070-6564 | Phosphofructokinase [Medicago truncatula]                                           | 13.13 | 0.0111 | 1.241 |
| Gm-r1070-7604 | At1g36050 [Arabidopsis thaliana]                                                    | 8.63  | 0.0260 | 1.242 |
| Gm-r1070-5241 | unnamed protein product [Arabidopsis thaliana]                                      | 11.87 | 0.0137 | 1.242 |
| Gm-r1070-5439 | In2-1 protein [Glycine max]                                                         | 11.30 | 0.0152 | 1.243 |
| Gm-r1070-4852 | glyceraldehyde 3-phosphate dehydrogenase [Solanum tuberosum]                        | 11.27 | 0.0153 | 1.244 |
| Gm-r1070-5473 | acyl-CoA thioesterase [Arabidopsis thaliana]                                        | 6.27  | 0.0462 | 1.244 |
| Gm-r1070-5823 | ubiquitin-specific protease 16 [Arabidopsis thaliana]                               | 13.62 | 0.0102 | 1.244 |
| Gm-r1070-9031 | chlorophyll a/b-binding protein CP24 precursor [Vigna radiata]                      | 6.49  | 0.0437 | 1.246 |
| Gm-r1070-3891 | No hits                                                                             | 9.25  | 0.0227 | 1.247 |
| Gm-r1088-1409 | No hits                                                                             | 5.56  | 0.0461 | 1.247 |
| Gm-r1070-5847 | UVB-resistance protein UVR8 [Arabidopsis thaliana]                                  | 11.70 | 0.0141 | 1.248 |
| Gm-r1070-4236 | cysteine proteinase [Glycine max]                                                   | 8.19  | 0.0287 | 1.250 |
| Gm-r1070-5463 | No hits                                                                             | 6.81  | 0.0402 | 1.250 |
| Gm-r1070-9041 | expressed protein [Arabidopsis thaliana]                                            | 7.49  | 0.0339 | 1.250 |
| Gm-r1070-7752 | 33 kDa polypeptide of water-oxidizing complex of photosystem II [Nicotiana tabacum] | 8.32  | 0.0279 | 1.251 |
| Gm-r1070-5457 | At1g64520/F1N19_10 proteasome regulatory subunit [Arabidopsis thaliana]             | 6.99  | 0.0384 | 1.258 |
| Gm-r1070-4599 | putative nitrate transporter NRT1-3 [Glycine max]                                   | 6.73  | 0.0410 | 1.259 |
| Gm-r1070-8505 | hypothetical protein [Arabidopsis thaliana]                                         | 9.24  | 0.0228 | 1.260 |
| Gm-r1070-5593 | L-galactose-1-phosphate phosphatase [Actinidia deliciosa]                           | 6.09  | 0.0486 | 1.261 |
| Gm-r1070-6948 | ferritin [Malus xiaojinensis]                                                       | 9.61  | 0.0211 | 1.262 |
| Gm-r1070-7584 | enoyl-ACP reductase [Nicotiana tabacum]                                             | 7.71  | 0.0321 | 1.263 |
| Gm-r1070-8125 | HMG-1 like protein gene [Glycine max]                                               | 6.32  | 0.0456 | 1.263 |
| Gm-r1070-3898 | unknown protein [Oryza sativa]                                                      | 12.61 | 0.0121 | 1.264 |
| Gm-r1070-5874 | unknown protein [Arabidopsis thaliana]                                              | 29.59 | 0.0016 | 1.264 |
| Gm-r1070-4035 | Sali3-2 [Glycine max]                                                               | 9.48  | 0.0217 | 1.265 |
| Gm-r1070-6421 | protein kinase family protein [Arabidopsis thaliana]                                | 11.95 | 0.0135 | 1.266 |
| Gm-r1070-5796 | putative NAD dependent epimerase [Arabidopsis thaliana]                             | 18.47 | 0.0051 | 1.268 |
| Gm-r1070-2576 | unknown protein [Arabidopsis thaliana]                                              | 7.42  | 0.0344 | 1.268 |
| Gm-r1070-5646 | No hits                                                                             | 18.21 | 0.0053 | 1.268 |
| Gm-r1070-6170 | NAM-like protein [Prunus persica] (5')                                              | 11.64 | 0.0143 | 1.272 |
| Gm-r1070-5852 | No hits                                                                             | 10.22 | 0.0187 | 1.273 |
| Gm-r1070-6989 | nucleic acid binding / transcription factor [Arabidopsis thaliana]                  | 7.06  | 0.0377 | 1.276 |

|               |                                                                                                                                                                    |       |        |       |
|---------------|--------------------------------------------------------------------------------------------------------------------------------------------------------------------|-------|--------|-------|
| Gm-r1070-4068 | No hits                                                                                                                                                            | 11.29 | 0.0152 | 1.281 |
| Gm-r1070-5468 | MYB transcription factor [Arabidopsis thaliana]                                                                                                                    | 43.60 | 0.0006 | 1.282 |
| Gm-r1070-5107 | At1g32230/F3C3_1 [Arabidopsis thaliana]                                                                                                                            | 12.67 | 0.0119 | 1.284 |
| Gm-r1070-5291 | No hits                                                                                                                                                            | 10.91 | 0.0163 | 1.284 |
| Gm-r1070-6647 | AT4g36780/C7A10_580 brassinosteroid signalling positive regulator-related (5')                                                                                     | 7.25  | 0.0359 | 1.285 |
| Gm-r1070-3503 | At3g03150 [Arabidopsis thaliana]                                                                                                                                   | 6.80  | 0.0403 | 1.286 |
| Gm-r1070-8143 | pentameric polyubiquitin                                                                                                                                           | 9.91  | 0.0199 | 1.287 |
| Gm-r1070-7595 | LHY protein [Phaseolus vulgaris]                                                                                                                                   | 11.64 | 0.0143 | 1.287 |
| Gm-r1070-8741 | OSJNBb0065L13.14 [Oryza sativa (japonica cultivar-group)]                                                                                                          | 7.86  | 0.0310 | 1.288 |
| Gm-r1070-6109 | lipoygenase [Phaseolus vulgaris]                                                                                                                                   | 25.18 | 0.0024 | 1.293 |
| Gm-r1070-3139 | gigantea [Arabidopsis thaliana]                                                                                                                                    | 11.62 | 0.0143 | 1.294 |
| Gm-r1070-5792 | vacuolar ATPase subunit E [Phaseolus acutifolius]                                                                                                                  | 10.96 | 0.0162 | 1.294 |
| Gm-r1070-8122 | No hits                                                                                                                                                            | 19.44 | 0.0045 | 1.302 |
| Gm-r1070-4646 | UDP-D-apiiose/UDP-D-xylose synthase [Arabidopsis thaliana]                                                                                                         | 8.61  | 0.0261 | 1.303 |
| Gm-r1070-3489 | cullin 1C [Nicotiana tabacum]                                                                                                                                      | 9.85  | 0.0201 | 1.304 |
| Gm-r1070-5877 | unknown [Arabidopsis thaliana]                                                                                                                                     | 10.88 | 0.0164 | 1.304 |
| Gm-r1070-4694 | NAD dependent epimerase/dehydratase family [Oryza sativa]                                                                                                          | 6.71  | 0.0412 | 1.306 |
| Gm-r1070-9006 | palmitoyl-acyl carrier protein thioesterase [Gossypium hirsutum]                                                                                                   | 18.55 | 0.0051 | 1.308 |
| Gm-r1088-3426 | unknown protein [Arabidopsis thaliana]                                                                                                                             | 6.94  | 0.0300 | 1.309 |
| Gm-r1070-4312 | putative Mob1-like protein [Oryza sativa]                                                                                                                          | 19.24 | 0.0046 | 1.310 |
| Gm-r1070-6762 | hypothetical protein [Oryza sativa]                                                                                                                                | 12.75 | 0.0118 | 1.312 |
| Gm-r1070-8950 | Helicase, C-terminal; Zinc finger, CCHC-type [Medicago truncatula] (5') Chain A, Crystal Structure Of Soybean Beta-Amylase Mutant (M51t) With Increased Ph Optimum | 25.16 | 0.0024 | 1.313 |
| Gm-r1070-8759 | Increased Ph Optimum                                                                                                                                               | 14.97 | 0.0083 | 1.313 |
| Gm-r1070-5278 | Ser/Thr protein kinase [Lotus corniculatus]                                                                                                                        | 12.58 | 0.0121 | 1.313 |
| Gm-r1070-5848 | malate dehydrogenase precursor [Medicago sativa]                                                                                                                   | 9.60  | 0.0212 | 1.313 |
| Gm-r1070-2400 | AT4g15470/dl3775w [Arabidopsis thaliana]                                                                                                                           | 20.91 | 0.0038 | 1.314 |
| Gm-r1070-3491 | chloroplast photosystem I reaction center V [Camellia sinensis]                                                                                                    | 8.20  | 0.0287 | 1.315 |
| Gm-r1070-8169 | Skp1 [Medicago sativa]                                                                                                                                             | 10.24 | 0.0186 | 1.315 |
| Gm-r1070-8564 | mRNA-binding protein precursor [Nicotiana tabacum]                                                                                                                 | 24.43 | 0.0026 | 1.316 |
| Gm-r1070-8635 | chloroplast RNA binding protein [Phaseolus vulgaris]                                                                                                               | 9.96  | 0.0197 | 1.316 |
| Gm-r1070-6262 | putative protein [Arabidopsis thaliana]                                                                                                                            | 9.22  | 0.0229 | 1.316 |
| Gm-r1070-7587 | putative protein [Arabidopsis thaliana]                                                                                                                            | 12.78 | 0.0117 | 1.316 |
| Gm-r1070-3509 | thioredoxin [Glycine max]                                                                                                                                          | 8.32  | 0.0279 | 1.316 |
| Gm-r1070-7756 | putative pyruvate dehydrogenase E1 beta subunit isoform 1 protein [Oryza sativa ]                                                                                  | 7.03  | 0.0379 | 1.322 |
| Gm-r1070-6300 | No hits                                                                                                                                                            | 14.93 | 0.0083 | 1.323 |

|               |                                                                                 |       |        |       |
|---------------|---------------------------------------------------------------------------------|-------|--------|-------|
| Gm-r1070-6633 | heat shock protein 70 [Nicotiana benthamiana]                                   | 6.40  | 0.0447 | 1.324 |
| Gm-r1070-7983 | At5g19590 [Arabidopsis thaliana]                                                | 20.69 | 0.0039 | 1.325 |
| Gm-r1070-6974 | translation initiation factor [Arabidopsis thaliana]                            | 7.31  | 0.0354 | 1.326 |
| Gm-r1070-7889 | unknown [Arabidopsis thaliana]                                                  | 7.14  | 0.0369 | 1.326 |
| Gm-r1070-3522 | putative caffeic acid methyl transferase [Arachis hypogaea]                     | 8.15  | 0.0290 | 1.327 |
| Gm-r1070-6244 | glutamine synthetase precursor [Glycine max]                                    | 8.98  | 0.0241 | 1.328 |
| Gm-r1070-7002 | DnaJ-like protein [Medicago sativa]                                             | 18.17 | 0.0053 | 1.328 |
| Gm-r1070-4274 | No hits                                                                         | 7.84  | 0.0311 | 1.334 |
| Gm-r1070-2347 | putative RNA recognition motif (RRM)-containing protein [Oryza sativa]          | 10.27 | 0.0185 | 1.338 |
|               | metal-dependent hydrolase-like protein [Oryza sativa (japonica cultivar-group)] | 6.22  | 0.0373 | 1.338 |
| Gm-r1088-1518 |                                                                                 |       |        |       |
| Gm-r1070-2941 | vacuolar H <sup>+</sup> -ATPase c subunit [Citrus unshiu]                       | 10.53 | 0.0176 | 1.339 |
| Gm-r1070-1976 | DNA-binding protein 4 [Nicotiana tabacum] (5')                                  | 8.24  | 0.0284 | 1.340 |
| Gm-r1070-6615 | hypothetical protein [Solanum tuberosum]                                        | 7.43  | 0.0344 | 1.341 |
| Gm-r1070-7605 | Unknown protein [Arabidopsis thaliana]                                          | 17.66 | 0.0057 | 1.343 |
| Gm-r1070-1672 | unnamed protein product [Arabidopsis thaliana]                                  | 13.51 | 0.0104 | 1.345 |
| Gm-r1070-6309 | hypothetical protein [Cicer arietinum]                                          | 7.11  | 0.0372 | 1.345 |
|               | cellulose synthase (EC 2.4.1.-) catalytic chain celA2 - upland cotton           |       |        |       |
| Gm-r1070-6616 | (fragment)                                                                      | 8.64  | 0.0260 | 1.346 |
|               | 1-deoxy-D-xylulose 5-phosphate reductoisomerase [Pueraria montana var. lobata]  |       |        |       |
| Gm-r1070-3733 |                                                                                 | 9.01  | 0.0240 | 1.347 |
| Gm-r1070-5787 | microsomal omega-3 fatty acid desaturase [Glycine max]                          | 6.82  | 0.0400 | 1.348 |
| Gm-r1070-4104 | No hits                                                                         | 11.81 | 0.0139 | 1.349 |
| Gm-r1070-6809 | unknown protein [Arabidopsis thaliana]                                          | 7.04  | 0.0378 | 1.349 |
| Gm-r1088-2089 | cation diffusion facilitator 9 [Stylosanthes hamata]                            | 5.36  | 0.0494 | 1.349 |
| Gm-r1070-9107 | synaptobrevin 1 [Oryza sativa (japonica cultivar-group)]                        | 18.95 | 0.0048 | 1.349 |
| Gm-r1070-7510 | phosphoglycerate mutase [Ricinus communis]                                      | 10.75 | 0.0169 | 1.352 |
| Gm-r1088-1727 | alpha-mannosidase precursor [Arabidopsis thaliana]                              | 5.35  | 0.0494 | 1.353 |
| Gm-r1070-9047 | receptor-like protein kinase [Nicotiana tabacum]                                | 11.79 | 0.0139 | 1.354 |
| Gm-r1070-5454 | No hits                                                                         | 8.48  | 0.0269 | 1.354 |
| Gm-r1070-1970 | No hits                                                                         | 12.28 | 0.0128 | 1.354 |
| Gm-r1070-8292 | homeodomain-leucine zipper protein 56 [Glycine max]                             | 6.41  | 0.0445 | 1.355 |
| Gm-r1070-3650 | unknown protein [Arabidopsis thaliana]                                          | 11.93 | 0.0136 | 1.357 |
| Gm-r1070-5070 | beta-amylase [Glycine max]                                                      | 16.41 | 0.0067 | 1.360 |
| Gm-r1070-7887 | malate synthase                                                                 | 8.27  | 0.0282 | 1.364 |
| Gm-r1070-5461 | NAC3 protein [Glycine max]                                                      | 8.98  | 0.0241 | 1.365 |
|               | transducin family protein / WD-40 repeat family protein [Arabidopsis thaliana]  |       |        |       |
| Gm-r1070-5835 |                                                                                 | 17.15 | 0.0061 | 1.366 |

|               |                                                                                                                                               |       |        |       |
|---------------|-----------------------------------------------------------------------------------------------------------------------------------------------|-------|--------|-------|
| Gm-r1070-8862 | expressed protein [Arabidopsis thaliana]                                                                                                      | 14.03 | 0.0096 | 1.368 |
| Gm-r1070-4141 | SEU3B protein [Antirrhinum majus]                                                                                                             | 9.40  | 0.0221 | 1.370 |
| Gm-r1070-7027 | cryptochrome 2A apoprotein [Pisum sativum]                                                                                                    | 11.96 | 0.0135 | 1.372 |
| Gm-r1070-3547 | putative purple acid phosphatase precursor [Phaseolus vulgaris]                                                                               | 7.13  | 0.0370 | 1.373 |
| Gm-r1070-2965 | Ca <sup>2+</sup> /H <sup>+</sup> -exchanging protein - mung bean                                                                              | 51.02 | 0.0004 | 1.373 |
| Gm-r1070-3546 | unknown protein [Oryza sativa (japonica cultivar-group)]                                                                                      | 9.64  | 0.0210 | 1.373 |
| Gm-r1070-2547 | No hits                                                                                                                                       | 10.93 | 0.0163 | 1.375 |
| Gm-r1070-8913 | auxin response factor-like protein [Mangifera indica]                                                                                         | 15.32 | 0.0079 | 1.376 |
| Gm-r1070-6975 | No hits                                                                                                                                       | 11.73 | 0.0141 | 1.376 |
| Gm-r1070-7793 | membrane related protein CP5, putative [Arabidopsis thaliana]                                                                                 | 8.15  | 0.0290 | 1.376 |
| Gm-r1070-1954 | histone H2B [Cicer arietinum]                                                                                                                 | 11.68 | 0.0142 | 1.379 |
| Gm-r1070-3342 | L-galactose-1-phosphate phosphatase [Actinidia deliciosa]                                                                                     | 14.75 | 0.0086 | 1.381 |
| Gm-r1070-8717 | putative chlorophyll a/b-binding protein [Arabidopsis thaliana]                                                                               | 14.07 | 0.0095 | 1.384 |
| Gm-r1070-7007 | Tubulin alpha-3 chain (Alpha-3 tubulin)                                                                                                       | 10.12 | 0.0190 | 1.387 |
| Gm-r1070-4114 | No hits                                                                                                                                       | 10.57 | 0.0174 | 1.387 |
| Gm-r1070-1738 | dehydrin [Glycine max]                                                                                                                        | 7.47  | 0.0340 | 1.389 |
| Gm-r1070-4704 | double WRKY type transfactor [Solanum tuberosum]                                                                                              | 8.38  | 0.0275 | 1.389 |
| Gm-r1070-6997 | remorin [Solanum tuberosum]                                                                                                                   | 13.30 | 0.0107 | 1.389 |
| Gm-r1070-1903 | No hits                                                                                                                                       | 7.57  | 0.0332 | 1.390 |
| Gm-r1088-1149 | outer envelope protein [Pisum sativum]                                                                                                        | 5.35  | 0.0494 | 1.390 |
| Gm-r1070-6232 | No hits                                                                                                                                       | 7.60  | 0.0330 | 1.391 |
| Gm-r1070-8148 | peptide methionine sulfoxide reductase; cPMSR [Gossypium barbadense]<br>Chain A, Crystal Structure Of Soybean Beta-Amylase Mutant (M51t) With | 10.00 | 0.0195 | 1.395 |
| Gm-r1070-8484 | Increased Ph Optimum                                                                                                                          | 11.88 | 0.0137 | 1.401 |
| Gm-r1070-8567 | putative NAD synthetase [Oryza sativa]                                                                                                        | 13.77 | 0.0100 | 1.403 |
| Gm-r1070-5887 | At1g69340/F10D13.28 [Arabidopsis thaliana]                                                                                                    | 6.50  | 0.0436 | 1.403 |
| Gm-r1070-5647 | No hits                                                                                                                                       | 14.29 | 0.0092 | 1.405 |
| Gm-r1088-2099 | indole-3-glycerol phosphate synthase [Arabidopsis thaliana]                                                                                   | 5.49  | 0.0472 | 1.409 |
| Gm-r1088-2285 | unnamed protein product [Arabidopsis thaliana]                                                                                                | 8.24  | 0.0208 | 1.411 |
| Gm-r1070-1927 | photosystem II protein Z [Glycine max] (5')                                                                                                   | 6.60  | 0.0424 | 1.412 |
| Gm-r1070-5797 | P-Protein precursor [Solanum tuberosum]                                                                                                       | 15.94 | 0.0072 | 1.417 |
| Gm-r1070-4563 | seed specific protein Bn15D1B [Brassica napus]                                                                                                | 11.19 | 0.0155 | 1.417 |
| Gm-r1070-5188 | subtilisin-like protease C1 [Glycine max]                                                                                                     | 9.21  | 0.0229 | 1.418 |
| Gm-r1070-5594 | vacuolar H <sup>+</sup> -ATPase B subunit [Citrus unshiu]                                                                                     | 27.29 | 0.0020 | 1.424 |
| Gm-r1070-3597 | phosphoenolpyruvate carboxykinase [Flaveria pringlei]                                                                                         | 10.79 | 0.0167 | 1.429 |
| Gm-r1070-5613 | beta-amylase [Glycine max]                                                                                                                    | 15.39 | 0.0078 | 1.434 |
| Gm-r1070-8296 | putative cinnamoyl-CoA reductase [Solanum demissum]                                                                                           | 7.62  | 0.0328 | 1.439 |
| Gm-r1070-5904 | putative glycerophosphoryl diester phosphodiesterase family protein                                                                           | 11.20 | 0.0155 | 1.439 |



|               |                                                                          |       |        |       |
|---------------|--------------------------------------------------------------------------|-------|--------|-------|
|               | [Nicotiana tabacum]                                                      |       |        |       |
| Gm-r1070-7310 | unknown protein [Arabidopsis thaliana]                                   | 13.58 | 0.0103 | 1.444 |
| Gm-r1070-1668 | No hits                                                                  | 7.61  | 0.0329 | 1.453 |
|               | phosphogluconate dehydrogenase (decarboxylating) (EC 1.1.1.44) - soybean | 6.54  | 0.0338 | 1.454 |
| Gm-r1088-7077 | plasma membrane polypeptide [Nicotiana tabacum]                          | 6.23  | 0.0467 | 1.454 |
| Gm-r1070-5440 | putative von Hippel-Lindau binding protein [Arabidopsis thaliana]        | 11.63 | 0.0143 | 1.459 |
| Gm-r1070-3821 | malate dehydrogenase (NADP+) [Pisum sativum]                             | 9.20  | 0.0230 | 1.465 |
| Gm-r1070-5817 | Formate--tetrahydrofolate ligase                                         | 63.54 | 0.0002 | 1.472 |
| Gm-r1070-8919 | Ferritin 3, chloroplast precursor (SFerH-3)                              | 6.97  | 0.0297 | 1.473 |
| Gm-r1088-4414 | adventitious rooting related oxygenase [Malus x domestica]               | 5.92  | 0.0410 | 1.475 |
| Gm-r1088-2301 | alpha-galactosidase preproprotein [Cyamopsis tetragonoloba]              | 5.85  | 0.0419 | 1.476 |
| Gm-r1088-2682 | No hits                                                                  | 6.89  | 0.0304 | 1.476 |
| Gm-r1088-183  | copper chaperone homolog CCH [Glycine max]                               | 20.05 | 0.0042 | 1.495 |
| Gm-r1070-7330 | hypothetical protein [Arabidopsis thaliana]                              | 8.48  | 0.0269 | 1.496 |
| Gm-r1070-1866 | No hits                                                                  | 6.02  | 0.0397 | 1.498 |
| Gm-r1088-555  | adenosine 5'-phosphosulfate reductase [Glycine max]                      | 18.72 | 0.0049 | 1.504 |
| Gm-r1070-8298 | putative protein [Arabidopsis thaliana]                                  | 15.27 | 0.0079 | 1.514 |
| Gm-r1070-3980 | probable aminopeptidase F24D7.4 [imported] - Arabidopsis thaliana        | 41.24 | 0.0007 | 1.516 |
| Gm-r1070-7908 | hydroxymethylbilane synthase [Arabidopsis thaliana]                      | 7.52  | 0.0254 | 1.533 |
| Gm-r1088-2863 | cysteine proteinase [Glycine max]                                        | 8.71  | 0.0256 | 1.536 |
| Gm-r1070-3592 | putative inorganic pyrophosphatase [Arabidopsis thaliana]                | 6.36  | 0.0357 | 1.559 |
| Gm-r1088-2667 | unknown protein [Arabidopsis thaliana]                                   | 8.91  | 0.0245 | 1.571 |
| Gm-r1070-2003 | No hits                                                                  | 9.94  | 0.0135 | 1.573 |
| Gm-r1088-1725 | No hits                                                                  | 13.24 | 0.0108 | 1.574 |
| Gm-r1070-3539 | No hits                                                                  | 11.80 | 0.0139 | 1.576 |
| Gm-r1070-1814 | No hits                                                                  | 11.66 | 0.0142 | 1.582 |
| Gm-r1070-2666 | ADP, ATP carrier-like protein [Arabidopsis thaliana]                     | 5.75  | 0.0433 | 1.600 |
| Gm-r1088-1920 | Ca <sup>2+</sup> /H <sup>+</sup> -exchanging protein - mung bean         | 40.58 | 0.0007 | 1.616 |
| Gm-r1070-5393 | No hits                                                                  | 6.60  | 0.0424 | 1.617 |
| Gm-r1070-5236 | dehydroascorbate reductase [Glycine max]                                 | 11.08 | 0.0158 | 1.620 |
| Gm-r1070-8413 | No hits                                                                  | 6.96  | 0.0298 | 1.621 |
| Gm-r1088-1712 | No hits                                                                  | 11.73 | 0.0141 | 1.627 |
| Gm-r1070-5643 | transcription factor EIL1 [Vigna radiata]                                | 7.63  | 0.0327 | 1.632 |
| Gm-r1070-5151 | bZIP DNA-binding protein [Antirrhinum majus]                             | 8.12  | 0.0215 | 1.643 |
| Gm-r1088-2878 | unknown protein [Oryza sativa]                                           | 19.83 | 0.0043 | 1.653 |
| Gm-r1070-9139 | AT3g15840 [Arabidopsis thaliana]                                         | 12.52 | 0.0122 | 1.655 |
| Gm-r1070-3635 | myo-inositol-1-phosphate synthase [Glycine max]                          | 6.21  | 0.0375 | 1.668 |
| Gm-r1088-4020 |                                                                          |       |        |       |

|               |                                                                 |       |        |       |
|---------------|-----------------------------------------------------------------|-------|--------|-------|
| Gm-r1070-7203 | At1g54990/F14C21_5 [Arabidopsis thaliana]                       | 11.62 | 0.0143 | 1.683 |
| Gm-r1070-5201 | Inositol-3-phosphate synthase [Glycine max]                     | 7.01  | 0.0382 | 1.714 |
| Gm-r1070-6113 | putative nitrate transporter NRT1-3 [Glycine max]               | 8.90  | 0.0245 | 1.734 |
| Gm-r1088-3446 | DnaJ domain family [Arabidopsis thaliana]                       | 6.79  | 0.0313 | 1.805 |
| Gm-r1070-7748 | granule-bound starch synthase Ib precursor [Phaseolus vulgaris] | 10.60 | 0.0173 | 1.829 |
| Gm-r1088-3448 | No hits                                                         | 5.41  | 0.0484 | 1.836 |
| Gm-r1088-3248 | plastidial phosphoglucomutase [Pisum sativum]                   | 6.49  | 0.0343 | 1.901 |
| Gm-r1088-3648 | aquaporin [Vitis vinifera]                                      | 9.82  | 0.0139 | 1.998 |

---
